# Supplementary material for: Electrochemical preparation of tin–titania nanocomposite arrays
Source: Royal Society of Chemistry journal article supplement (doi:10.1039/c6ra19209b), 2016-01-01
Supplement: c6ra19209b1.pdf [file c6ra19209b1.pdf]

# Electrochemical Preparation of Tin-Titania Nanocomposite Arrays

- Electronic Supplementary Information -

Denise Prutsch<sup>a</sup>, Martin Wilkening<sup>a,b</sup>, Ilie Hanzu<sup>a,b,\*</sup>

- a. Institute of Chemistry and Technology of Materials, Graz University of Technology, Stremayrgasse 9, 8010 Graz, Austria.
- b. Christian Doppler Laboratory for Li-ion Batteries, Graz University of Technology, Stremayrgasse 9, 8010 Graz, Austria.

\*corresponding author: hanzu@tugraz.at

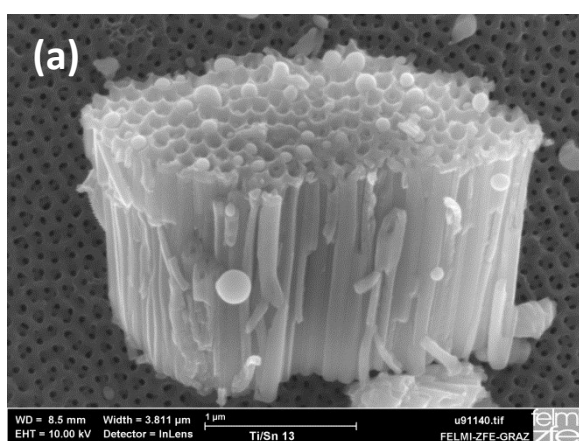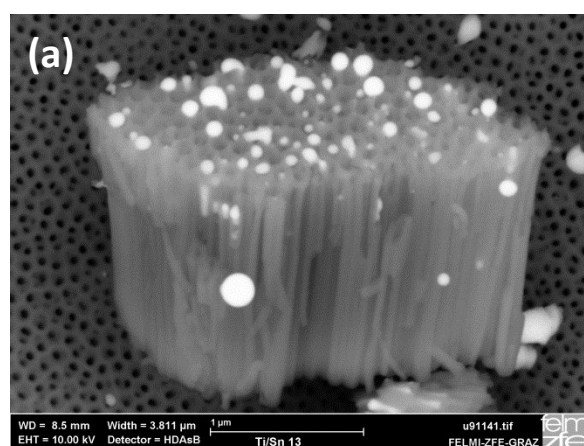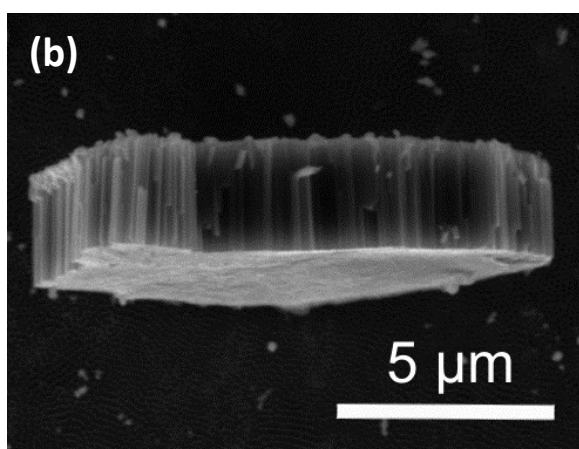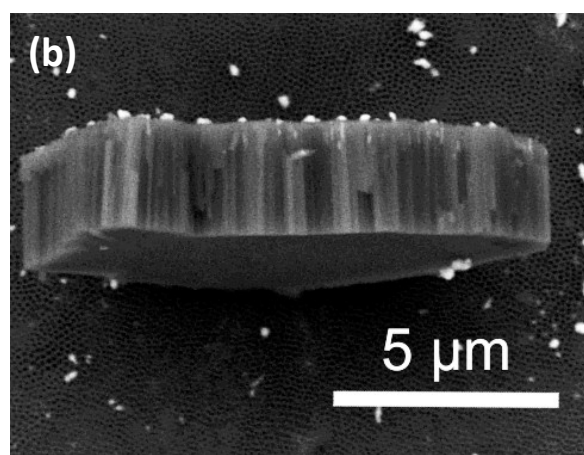

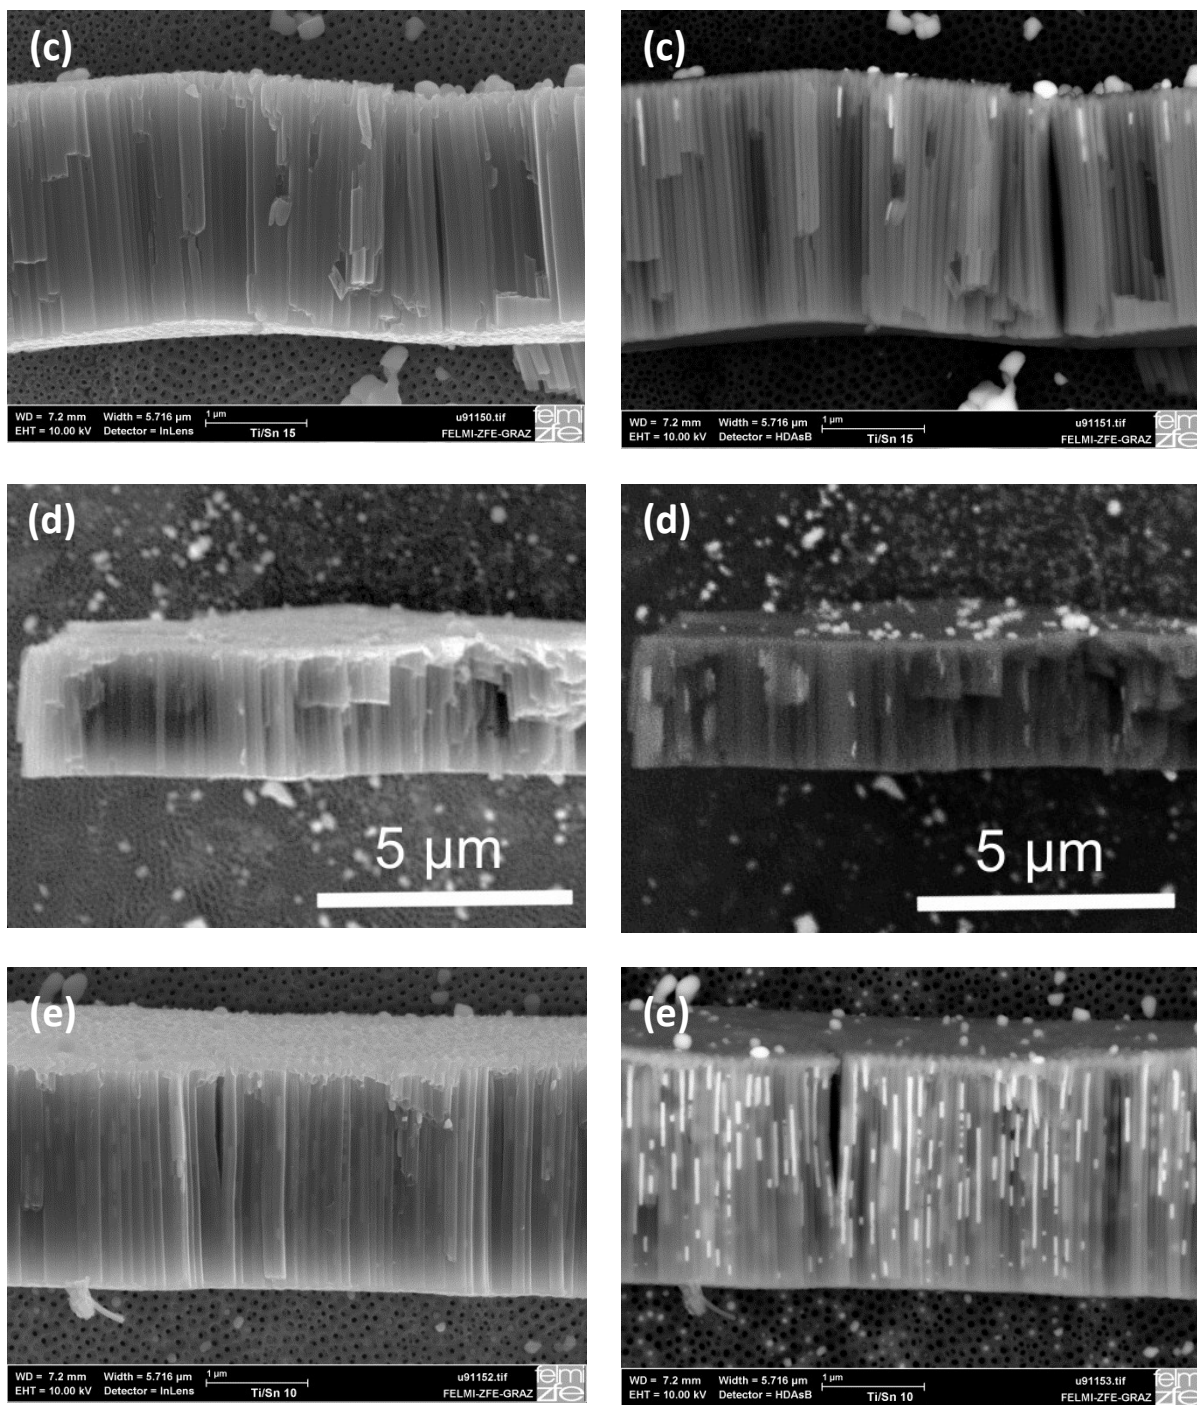

Figure S1. SEM pictures of Sn-TiO<sub>2</sub> nanocomposites after 2 (a), 5 (b), 10 (c), 20 (d) and 90 (e) electrodeposition cycles. The nucleation and growth of the Sn deposit is taking place from the open top of the nanotubes. The micrographs on the *left* panel were acquired in **SE** (Secondary Electrons) mode while those on the *right* panel were acquired in **BSE** (Back Scattered Electrons) mode at much better chemical elements contrast.

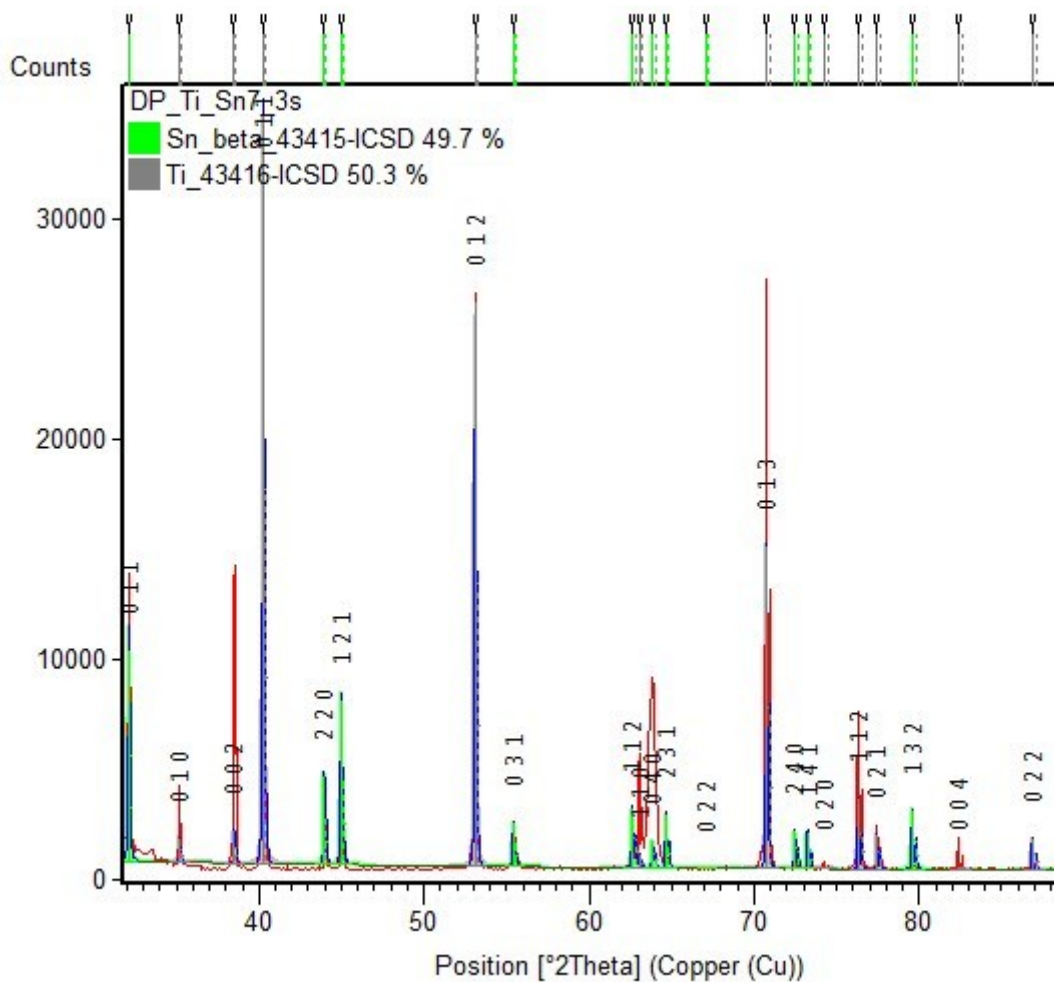

Figure S2. X-ray diffraction pattern of a  $\text{TiO}_2$ -Sn nanocomposite. Only the reflections of Sn and metallic Ti substrate are visible, the  $\text{TiO}_2$  nanotubes are amorphous and do not present any crystalline reflections. Thus, we can conclude that the chemically different phase seen by SEM inside the  $\text{TiO}_2$  nanotubes consists of  $\beta$ -Sn (Space group I 41 /a m d, ICSD No. 43415).
